# Supplementary material
Source: MDPI journal article supplement (https://www.mdpi.com/2073-4344/13/7/1068)
Supplement: s1 [file s1]

# SUPPLEMENTARY MATERIAL

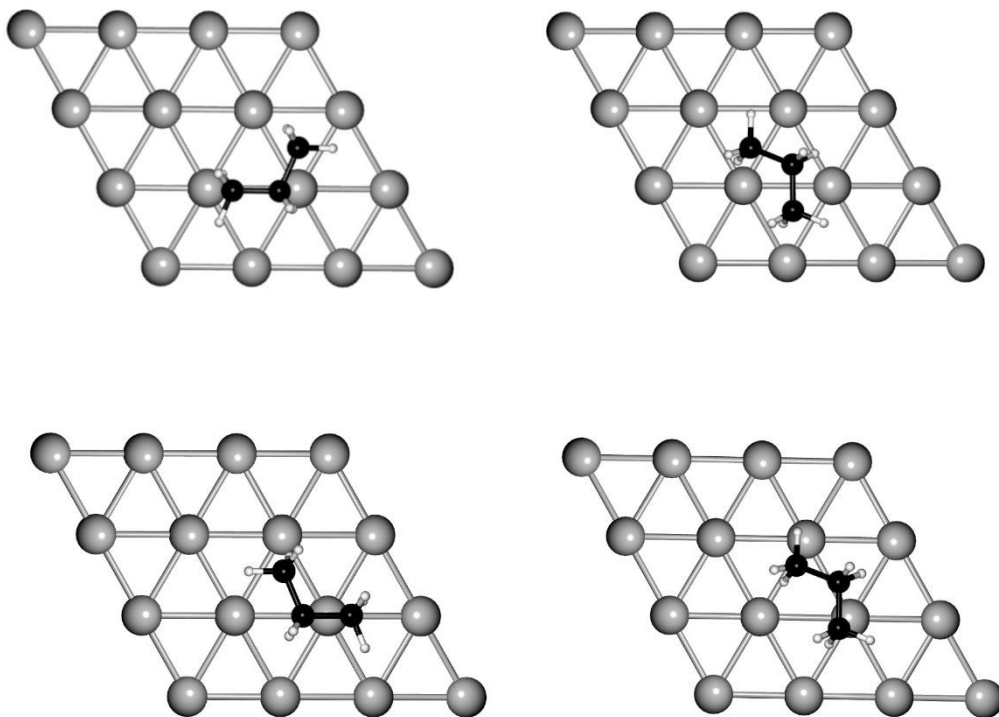

**Figure S1.** initial geometries for optimization calculations of propane adsorption over Ag(111).

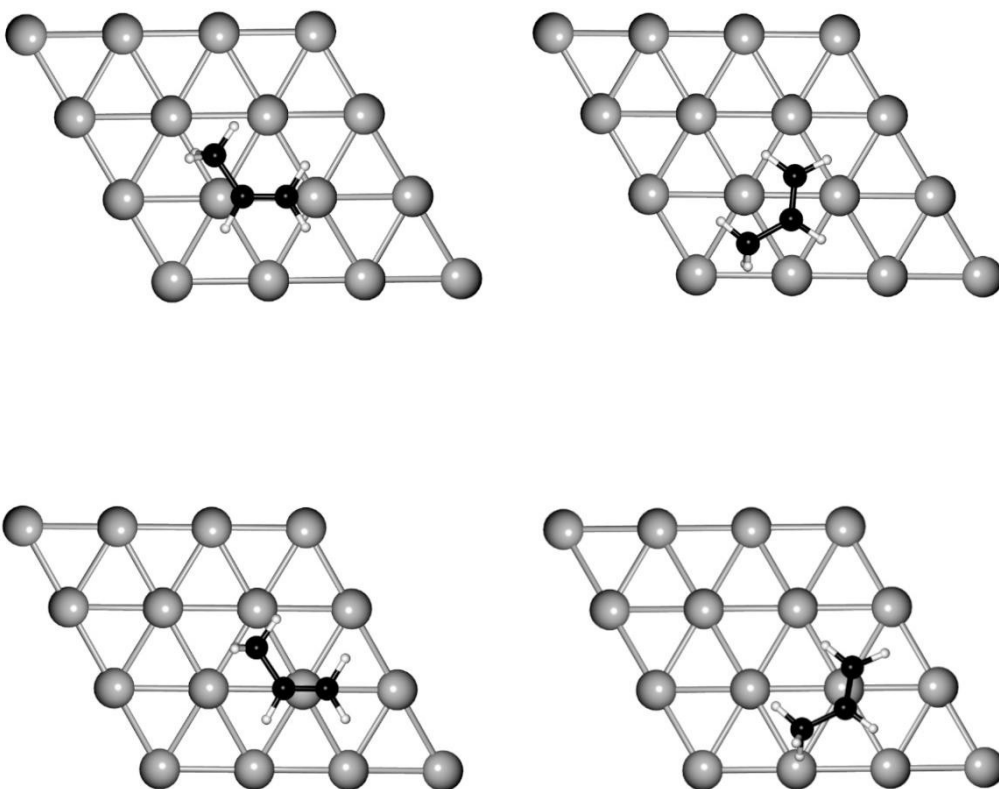

**Figure S2.** initial geometries for optimization calculations of propene adsorption over Ag(111).

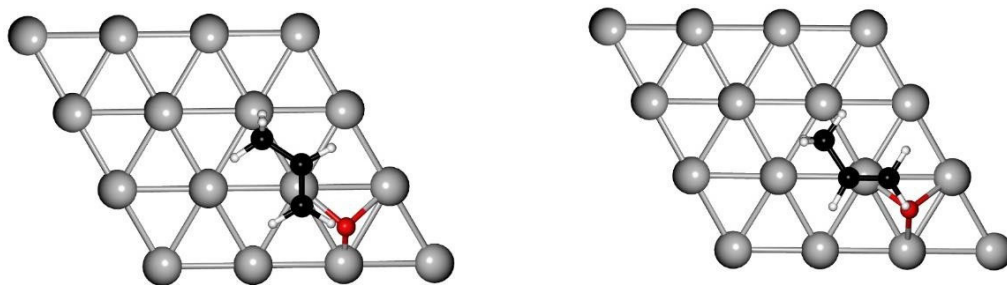

**Figure S3.** initial geometries for optimization calculations of propene adsorption over Ag(111) with a O adatom.
